# Supplementary material for: An atomically precise Ag18Cu8nanocluster with rich alkynyl–metal coordination structures and unique SbF6−assembling modes
Source: Royal Society of Chemistry journal article supplement (doi:10.1039/d2nr05814f), 2022-12-16
Supplement: d2nr05814f1.pdf [file d2nr05814f1.pdf]

## **An Atomically Precise Ag<sub>18</sub>Cu<sub>8</sub> Nanocluster with Rich Alkynyl-Metal Coordination Structures and Unique SbF<sub>6</sub><sup>-</sup> Assembling Modes**

Xueli Sun<sup>1,+</sup>, Xiongfai Tang<sup>2,+</sup>, Yan-Li Gao<sup>3</sup>, Yujuan Zhao<sup>1</sup>, Qingyuan Wu<sup>2</sup>, Dongxu Cao<sup>2</sup> and Hui Shen<sup>1,\*</sup>

<sup>1</sup> College of Energy Materials and Chemistry, Inner Mongolia University, Hohhot 010021, China

<sup>2</sup> College of Chemistry and Chemical Engineering, Xiamen University, Xiamen 361005, China

<sup>3</sup> School of Chemistry and Chemical Engineering, Yulin University, Yulin 719000, China

+These authors contributed equally to this work

E-mail: shen@imu.edu.cn

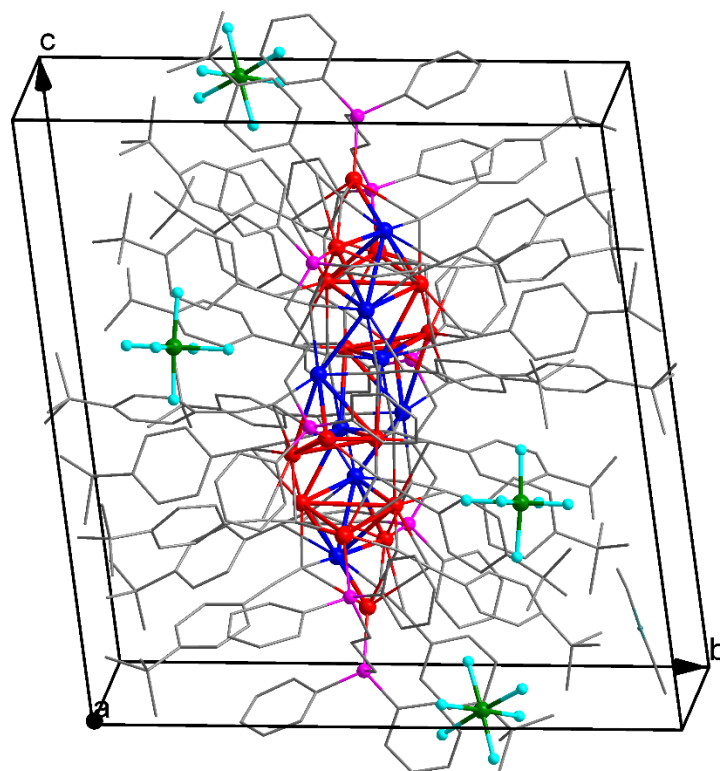

**Figure S1.** The packing structure of  $[\text{Ag}_{18}\text{Cu}_8(\text{dppp})_4(\text{}^t\text{Bu-C}_6\text{H}_4\text{C}\equiv\text{C})_{22}](\text{SbF}_6)_4$  in the unit cell. Color codes for atoms: red spheres, Ag; blue spheres, Cu; pink spheres, P; grey spheres, C; green spheres, Sb; turquoise spheres, F; teal spheres, O. All hydrogen atoms are omitted for clarity.

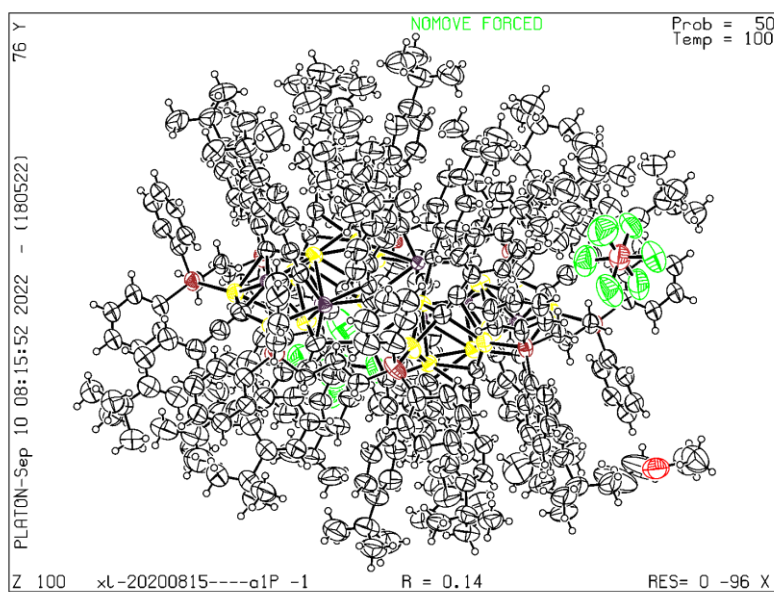

**Figure S2.** The thermal ellipsoids of the ORTEP diagram of  $[\text{Ag}_{18}\text{Cu}_8(\text{dppp})_4(\text{}^t\text{Bu-C}_6\text{H}_4\text{C}\equiv\text{C})_{22}](\text{SbF}_6)_4$ .

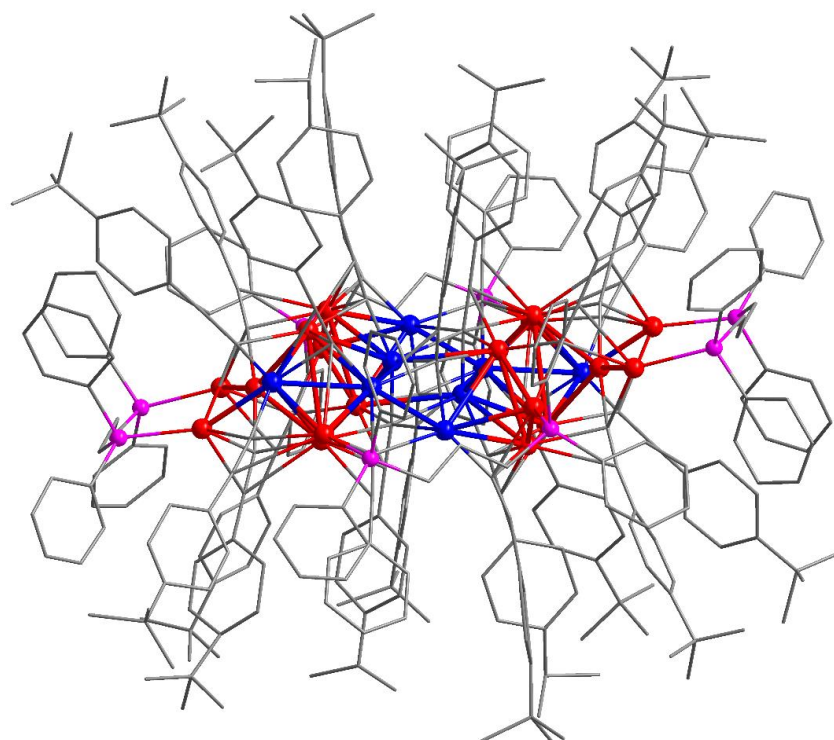

**Figure S3.** Total structure of  $[\text{Ag}_{18}\text{Cu}_8(\text{dppp})_4(\text{tBu-C}_6\text{H}_4\text{C}\equiv\text{C})_{22}]^{4+}$  in the side view. Color codes for atoms: red spheres, Ag; blue spheres, Cu; pink spheres, P; grey spheres, C. All hydrogen atoms are omitted for clarity.

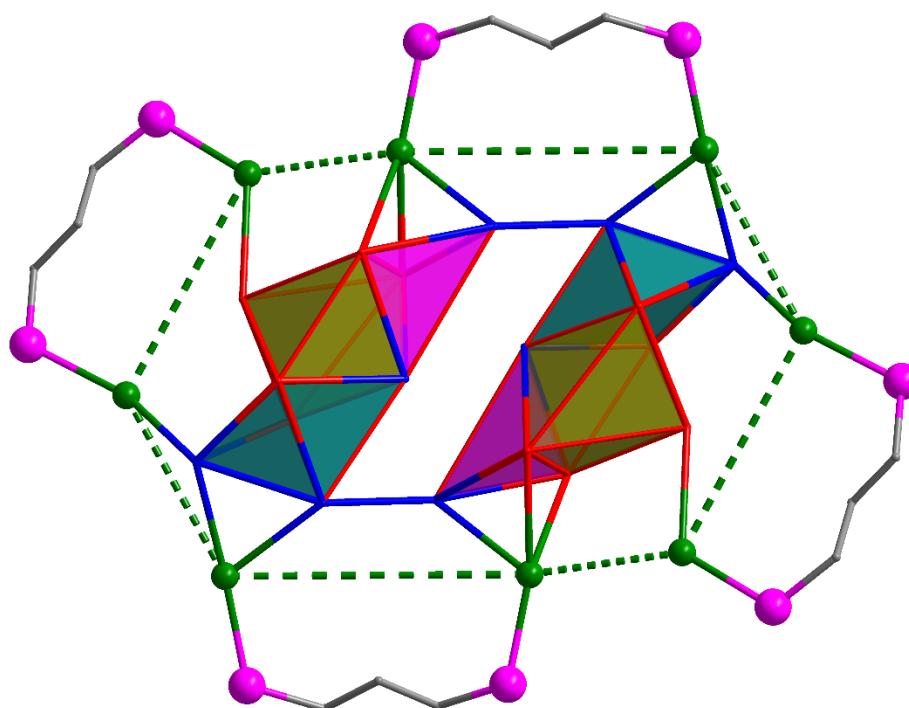

**Figure S4.**  $\text{Ag}_{10}\text{Cu}_8$  core and an 8-silver-atom-shell in  $[\text{Ag}_{18}\text{Cu}_8(\text{dppp})_4(\text{tBu-C}_6\text{H}_4\text{C}\equiv\text{C})_{22}]^{4+}$  cluster. Color codes for atoms: red spheres, Ag in the  $\text{Ag}_{10}\text{Cu}_8$  core; green spheres, Ag in the  $\text{Ag}_8$  shell; blue spheres, Cu; pink spheres, P; grey spheres, C. All hydrogen atoms are omitted for clarity.

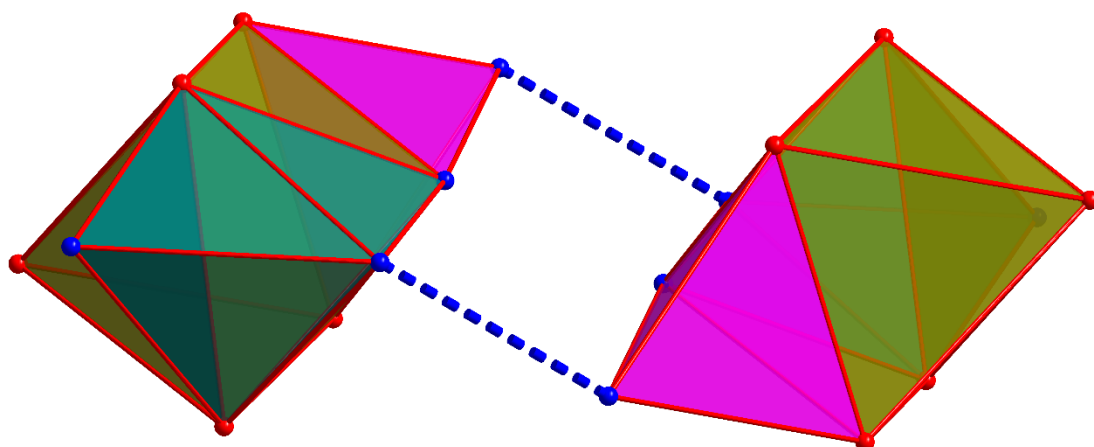

**Figure S5.** Combination of two mixed polyhedrons in  $\text{Ag}_{18}\text{Cu}_8$  metal core in the side view.

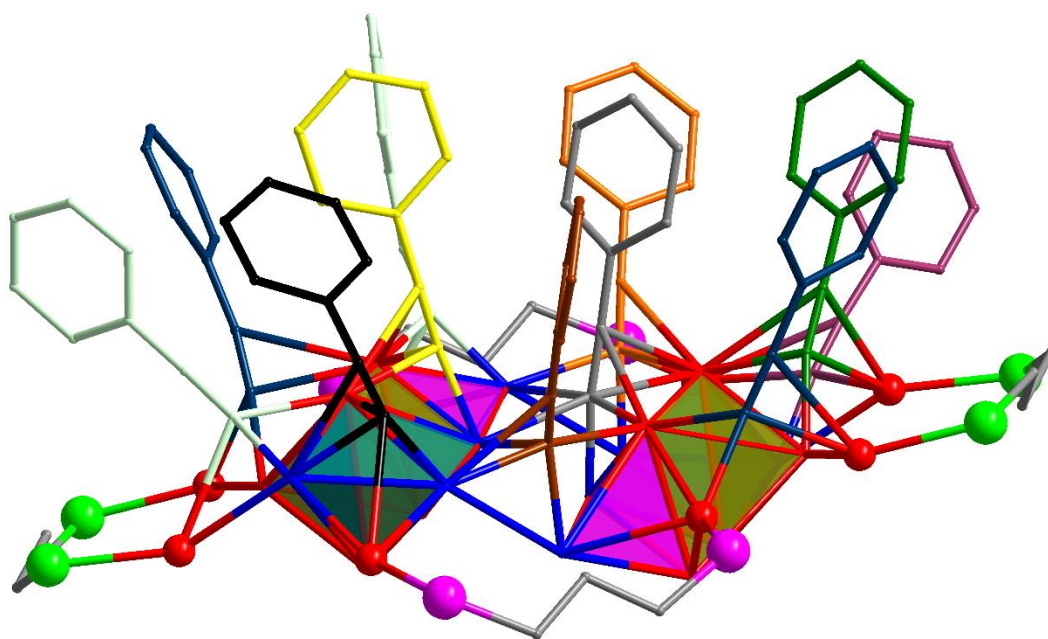

**Figure S6.** Rich coordination structure of alkyne ligands and different coordination environment of dppp in  $[\text{Ag}_{18}\text{Cu}_8(\text{dppp})_4(\text{t-Bu-C}_6\text{H}_4\text{C}\equiv\text{C})_{22}]^{4+}$  cluster. Color codes for atoms: red spheres, Ag; blue spheres, Cu; pink and bright green spheres, P. The alkyne ligands with different coordination modes are marked with different colors. All hydrogen atoms are omitted for clarity.

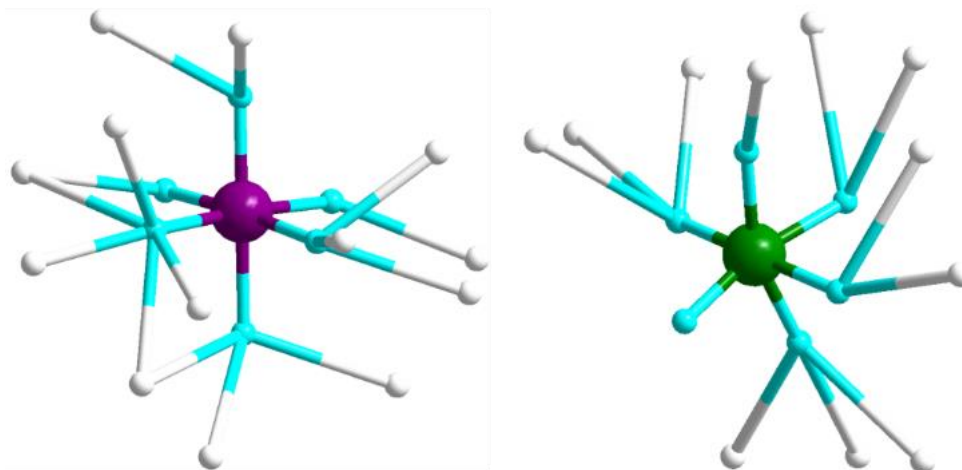

**Figure S7.** The  $\text{SbF}_6$  anions interact with the cluster moieties in two kinds of modes: one (two for each cluster, marked with green) is sandwiching the cluster, and another (two for each cluster, marked with violet) is connecting two clusters. Color codes for atoms: violet and green spheres, Sb; white spheres, H. All other atoms are omitted for clarity.

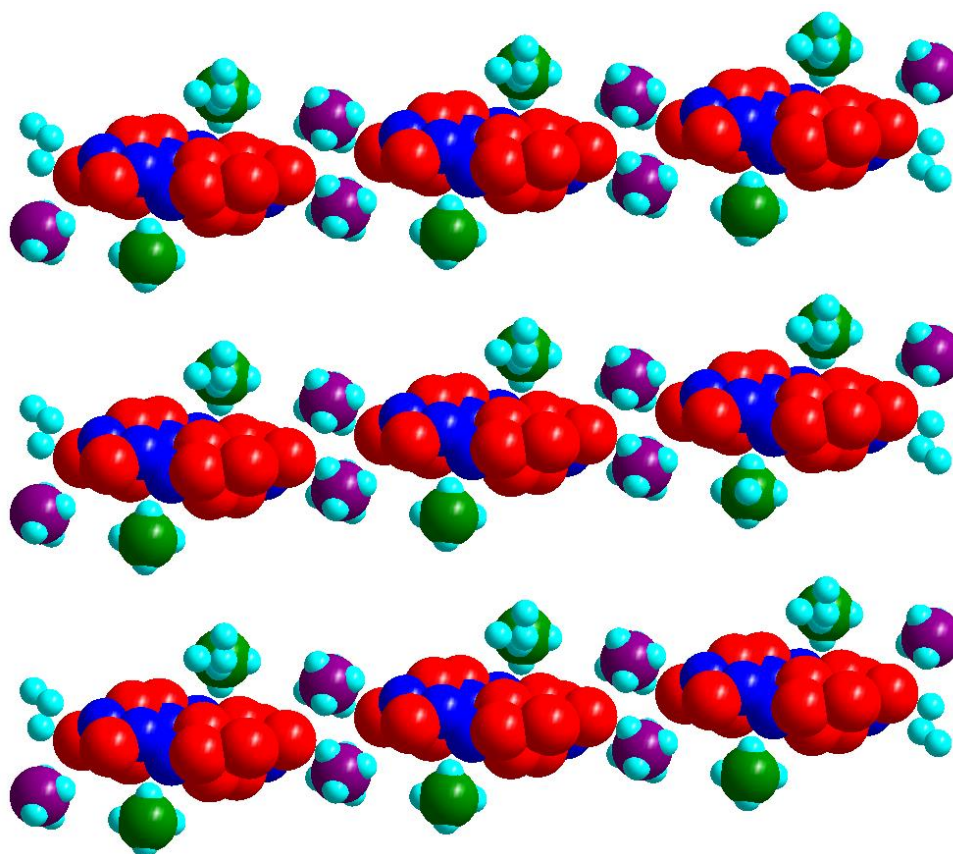

**Figure S8.** The packing structure of  $[\text{Ag}_{18}\text{Cu}_8(\text{dppp})_4(\text{tBu-C}_6\text{H}_4\text{C}\equiv\text{C})_{22}](\text{SbF}_6)_4$  highlighting the arrangement of cluster moieties and  $\text{SbF}_6$  anions. The cluster moieties are arranged layer-by-layer along X-axis through  $\text{SbF}_6$  anions of violet. Color codes for atoms: red spheres, Ag; blue spheres, Cu; orange spheres, P; grey spheres, C; green and violet spheres, Sb; turquoise spheres, F.

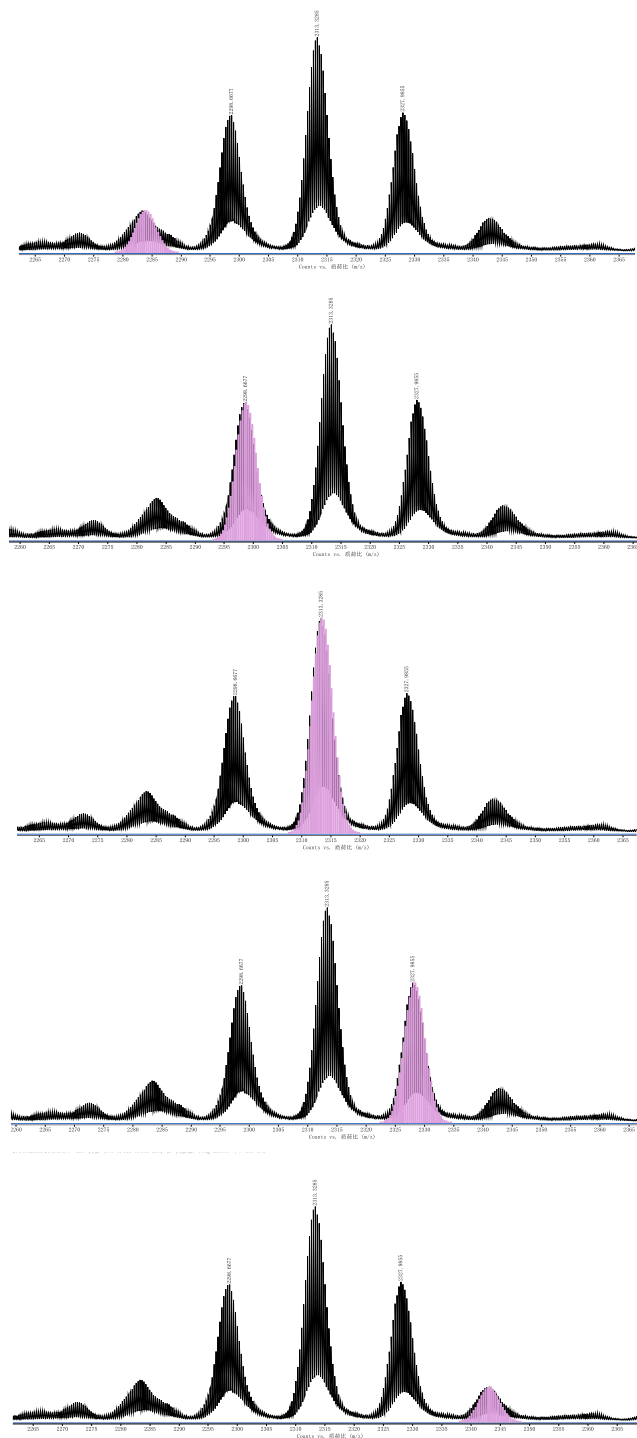

**Figure S9.** The presence of Ag-Cu exchange in ESI-MS spectra of  $[\text{Ag}_{18}\text{Cu}_8(\text{dppp})_4(^t\text{Bu-C}_6\text{H}_4\text{C}\equiv\text{C})_{22}]^{4+}$ . From top to bottom is the experimental and simulated isotopic patterns of the molecular ion peak  $[\text{Ag}_{16+x}\text{Cu}_{8-x}(\text{dppp})_3(^t\text{Bu-C}_6\text{H}_4\text{C}\equiv\text{C})_{20}(\text{SbF}_6)]^{3+}$  ( $x=0-5$ ), respectively.

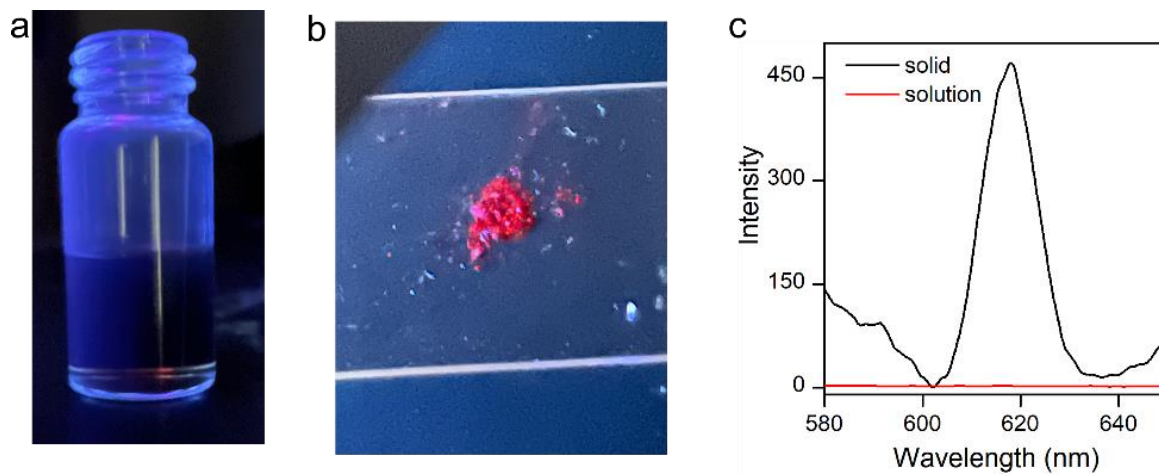

**Figure S10.** (a, b) Photographs of the solution and crystals of  $\text{Ag}_{18}\text{Cu}_8$  clusters under UV light. (c) Emission spectra of  $\text{Ag}_{18}\text{Cu}_8$  in crystalline and solution forms.

**Table S1.** Crystallographic data of  $[\text{Ag}_{18}\text{Cu}_8(\text{dppp})_4(\text{tBu-C}_6\text{H}_4\text{C}\equiv\text{C})_{22}](\text{SbF}_6)_4\cdot 2(\text{C}_4\text{H}_{10}\text{O})$ .

|                                        |                                                                                                                                                           |
|----------------------------------------|-----------------------------------------------------------------------------------------------------------------------------------------------------------|
| Identification code                    | $[\text{Ag}_{18}\text{Cu}_8(\text{dppp})_4(\text{tBu-C}_6\text{H}_4\text{C}\equiv\text{C})_{22}](\text{SbF}_6)_4\cdot 2(\text{C}_4\text{H}_{10}\text{O})$ |
| Formula                                | $\text{C}_{380}\text{H}_{410}\text{Ag}_{18}\text{Cu}_8\text{F}_{24}\text{O}_2\text{P}_8\text{Sb}_4$                                                       |
| Formula weight                         | 8649.79                                                                                                                                                   |
| Temperature/K                          | 100.01(10)                                                                                                                                                |
| Crystal system                         | triclinic                                                                                                                                                 |
| Space group                            | P -1                                                                                                                                                      |
| a (Å)                                  | 20.8417(11)                                                                                                                                               |
| b (Å)                                  | 21.4892(12)                                                                                                                                               |
| c (Å)                                  | 23.9061(12)                                                                                                                                               |
| $\alpha$ (°)                           | 86.621(4)                                                                                                                                                 |
| $\beta$ (°)                            | 66.127(5)                                                                                                                                                 |
| $\gamma$ (°)                           | 71.885(5)                                                                                                                                                 |
| V (Å <sup>3</sup> )                    | 9277.9(9)                                                                                                                                                 |
| Z                                      | 1                                                                                                                                                         |
| D <sub>c</sub> / (g cm <sup>-3</sup> ) | 1.548                                                                                                                                                     |
| Radiation                              | Cu K $\alpha$ ( $\lambda = 1.54184$ Å)                                                                                                                    |
| Theta (°) range                        | 3.7330 to 61.1100                                                                                                                                         |
| Index ranges                           | $-23 \leq h \leq 23, -21 \leq k \leq 24, -27 \leq l \leq 24$                                                                                              |
| Refls. Total                           | 28489                                                                                                                                                     |
| Restraints                             | 13393                                                                                                                                                     |
| Parameters                             | 1960                                                                                                                                                      |
| R <sub>int</sub>                       | 0.1458                                                                                                                                                    |
| R <sub>1</sub> /wR <sub>2</sub>        | 0.1391                                                                                                                                                    |
| [I > 2 $\sigma$ (I)]                   | 0.3293                                                                                                                                                    |
| R <sub>1</sub> /wR <sub>2</sub>        | 0.2057                                                                                                                                                    |
| (all data)                             | 0.4267                                                                                                                                                    |
| Completeness                           | 0.9986                                                                                                                                                    |
| GoF                                    | 1.127                                                                                                                                                     |



**Table S2.** Selected bond lengths (Å) for compound [Ag<sub>18</sub>Cu<sub>8</sub>(dppp)<sub>4</sub>(<sup>t</sup>Bu-C<sub>6</sub>H<sub>4</sub>C≡C)<sub>22</sub>](SbF<sub>6</sub>)<sub>4</sub>•2(C<sub>4</sub>H<sub>10</sub>O).

| Parameter | value    | Parameter | value    |
|-----------|----------|-----------|----------|
| Ag1-Ag2   | 2.935(2) | Ag5-Cu4   | 3.070(3) |
| Ag1-Ag3   | 2.941(2) | Ag6-Ag7   | 3.269(3) |
| Ag1-Ag6   | 3.318(2) | Ag6-Ag9   | 2.923(3) |
| Ag1-Ag9   | 3.304(2) | Ag7-Cu4   | 2.677(3) |
| Ag1-Cu1   | 2.969(3) | Ag7-P2    | 2.414(5) |
| Ag1-Cu2   | 3.009(3) | Ag8-Cu3   | 2.740(3) |
| Ag2-Ag3   | 2.808(2) | Ag8-Cu4   | 2.686(3) |
| Ag2-Cu2   | 2.988(3) | Ag8-P3    | 2.390(6) |
| Ag2-Cu1   | 3.102(3) | Ag9-Cu1   | 2.937(3) |
| Ag3-Cu2   | 2.784(3) | Ag9-Cu3   | 2.953(3) |
| Ag3-P4    | 2.404(6) | Ag9-Cu4   | 2.642(3) |
| Ag4-Ag6   | 2.805(3) | Cu1-Cu1'  | 2.973(4) |
| Ag4-P1    | 2.427(5) | Cu1-Cu2'  | 2.990(4) |
| Ag5-Ag6   | 2.916(3) | Cu2-Cu3   | 2.813(4) |
| Ag5-Ag9   | 3.187(2) | Cu3-Cu4   | 2.865(4) |
| Ag5-Cu3   | 2.812(3) |           |          |
